# Supplementary material
Source: PubMed Central journal article supplement (PMC2527109)
Supplement: supp_M800467200_Chandra_JBC_Supp_Fig_Final.pdf [file supp_M800467200_Chandra_JBC_Supp_Fig_Final.pdf]

CFP-AR

HttN136-YFP

Merged

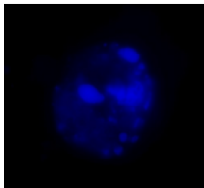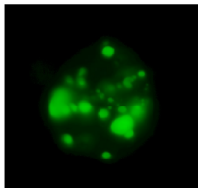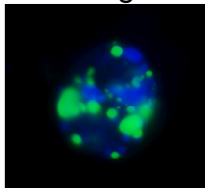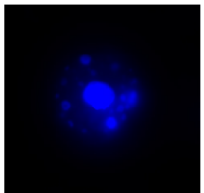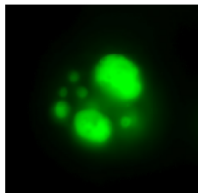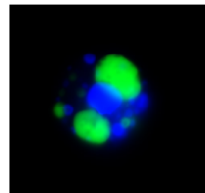

**Supplemental Figure 1: AR and HttN136 localize to discrete cytoplasm puncta.** CFP-AR (blue channel) and HttN136YFP (green channel) were cotransfected into HeLa cells and treated with 10nM DHT. Two cells were imaged in which each protein had formed cytoplasm puncta. The puncta are discrete, and show no overlap.
